# Supplementary material
Source: PubMed Central journal article supplement (PMC4292880)
Supplement: NIHMS650474-supplement-01.pdf [file NIHMS650474-supplement-01.pdf]

**SUPPLEMENTAL MATERIAL**

**Table 1. Patients' characteristics and outcome**

| Patient# | Age | Gender | Medications            | Structural heart disease | Duration of AF (years) | AF Type | # previous ablations | DF gradient in EGMs | DF gradient in BSPM | DF guided ablation     | SR conversion during ablation |
|----------|-----|--------|------------------------|--------------------------|------------------------|---------|----------------------|---------------------|---------------------|------------------------|-------------------------------|
| 1        | 47  | M      | Flecainide, Bisoprolol | No                       | 3                      | Parox   | 3                    | Yes                 | Yes                 | No                     | Yes                           |
| 2        | 54  | M      | Flecainide             | No                       | 7                      | Parox   | 1                    | Yes                 | Yes                 | No                     | Yes                           |
| 3        | 64  | M      | Flecainide, Atenolol   | No                       | 4                      | Parox   | 1                    | Yes                 | Yes                 | DF abl. after CPVI     | Yes                           |
| 4        | 49  | M      | Atenolol               | No                       | 3                      | Parox   | 3                    | Yes                 | Yes                 | Yes                    | No                            |
| 5        | 51  | M      | Flecainide, Atenolol   | No                       | 2                      | Parox   | 1                    | Yes                 | Yes                 | No                     | No                            |
| 6        | 60  | M      | Digoxine               | No                       | 3                      | Persist | 0                    | Yes                 | Yes                 | No                     | No                            |
| 7        | 61  | M      | Propafenone            | No                       | 17                     | Parox   | 2                    | Yes                 | Yes                 | DF abl. after CPVI     | No                            |
| 8        | 47  | M      | Carvediol, Digoxine    | TCM                      | 3                      | Persist | 1                    | Yes                 | No                  | Yes (followed by CPVI) | No                            |
| 9        | 59  | M      | Atenolol               | No                       | 5                      | Persist | 0                    | No                  | No                  | No                     | No                            |
| 10       | 65  | M      | Atenolol               | No                       | 5                      | Persist | 1                    | Yes                 | No                  | No                     | No                            |
| 11       | 68  | F      | Atenolol               | No                       | 7                      | Parox   | 0                    | Yes                 | Yes                 | No                     | No                            |
| 12       | 67  | M      | Flecainide, Bisoprolol | No                       | 10                     | Parox   | 1                    | No                  | No                  | DF abl. after CPVI     | No                            |
| 13       | 47  | M      | Bisoprolol             | Ischemic                 | 1                      | Parox   | 0                    | Yes                 | Yes                 | No                     | Yes                           |
| 14       | 49  | M      | Bisoprolol             | No                       | 2                      | Parox   | 0                    | Yes                 | No                  | No                     | Yes                           |

M: male; F: female; TCM: tachycardiomyopathy; Parox: paroxysmal AF; Persist: persistent AF; SR: sinus rhythm
